# Supplementary material for: Effect of the Synthetic Approach on the Formation and Magnetic Properties of Iron-Based Nanophase in Branched Polyester Polyol Matrix
Source: MDPI journal article supplement (doi:10.3390/ijms232314764), 2022-11-25
Supplement: s1 [file s1]

# Effect of the Synthetic Approach on the Formation and Magnetic Properties of Iron-Based Nanophase in Branched Polyester Polyol Matrix

Artur Khannanov <sup>1</sup>, Anastasia Burmatova <sup>1</sup>, Klara Ignatyeva <sup>1</sup>, Farit Vagizov <sup>2</sup>, Airat Kiyamov <sup>2,\*</sup>, Dmitrii Tayurskii <sup>2</sup>, Mikhail Cherosov <sup>2</sup>, Alexander Gerasimov <sup>1</sup>, Evtugyn Vladimir <sup>3</sup> and Marianna Kuttyreva <sup>1</sup>

<sup>1</sup> Butlerov Chemistry Institute, Kazan Federal University, Kazan 420008, Russia

<sup>2</sup> Institute of Physics, Kazan Federal University, Kazan 420008, Russia

<sup>3</sup> Interdisciplinary Center "Analytical Microscopy", Kazan Federal University, Kazan 420008, Russia

\* Correspondence: [ajrat.kiyamov@kpfu.ru](mailto:ajrat.kiyamov@kpfu.ru)

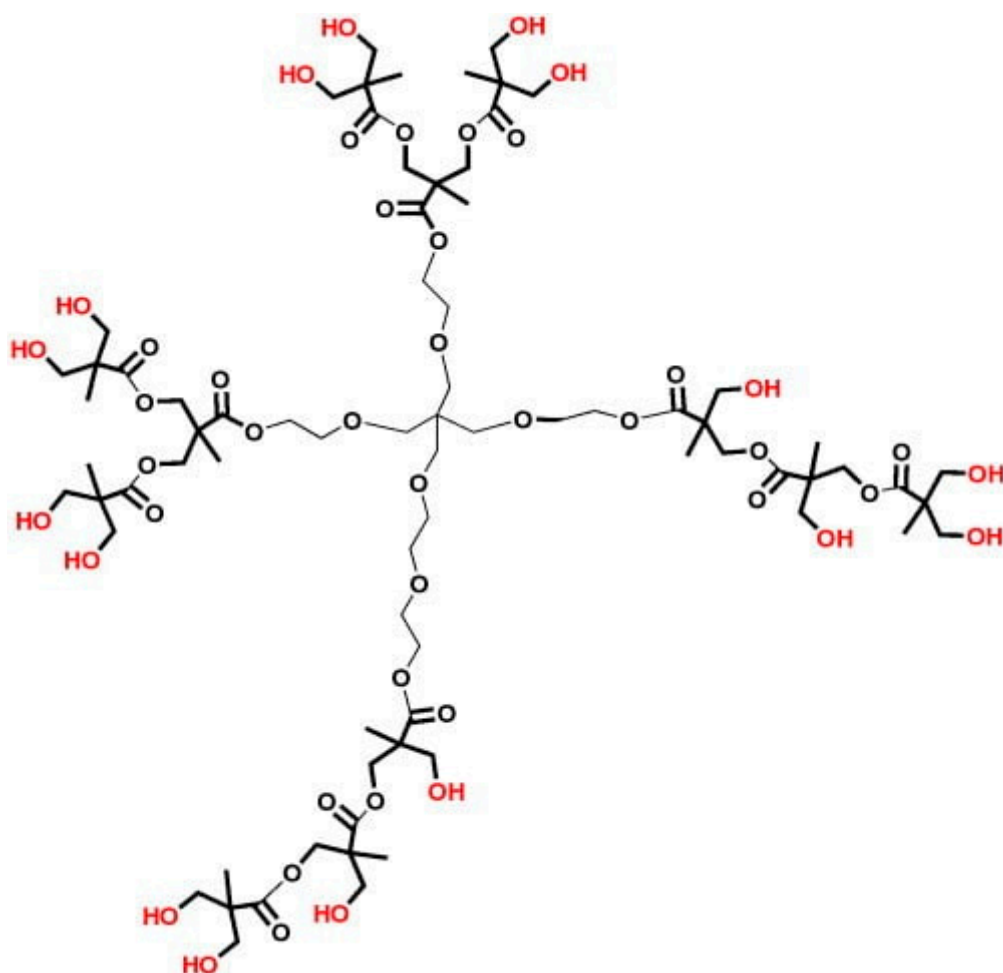

Figure S1. Theoretical structure of Boltorn H20

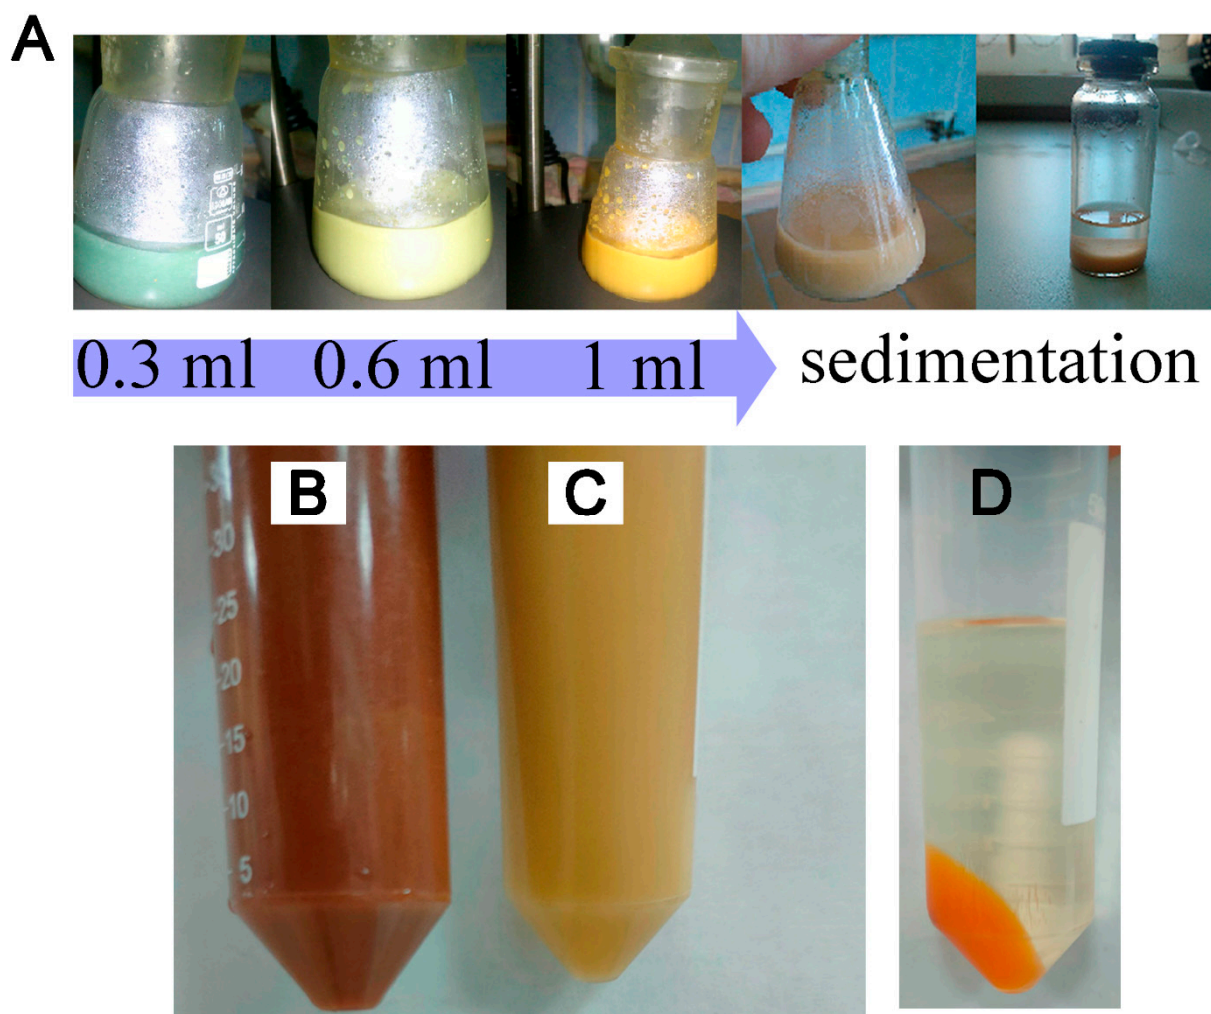

Figure S2. A) ChemRed-NP Change in the color of solutions during the synthesis of  $\text{Fe}_m\text{O}_n/\text{H}_2\text{O}$  nanoparticles with the addition of  $\text{N}_2\text{H}_4 \times \text{H}_2\text{O}$  and color of the dispersed system containing composite  $\text{Fe}_m\text{O}_n/\text{H}_2\text{O}$  nanoparticles at the end of the synthesis reaction; B) TermRed-NP reaction mixture during washing before centrifugation; C) US/TermRed-NP reaction mixture during washing before centrifugation;; D) US-NP after centrifugation.

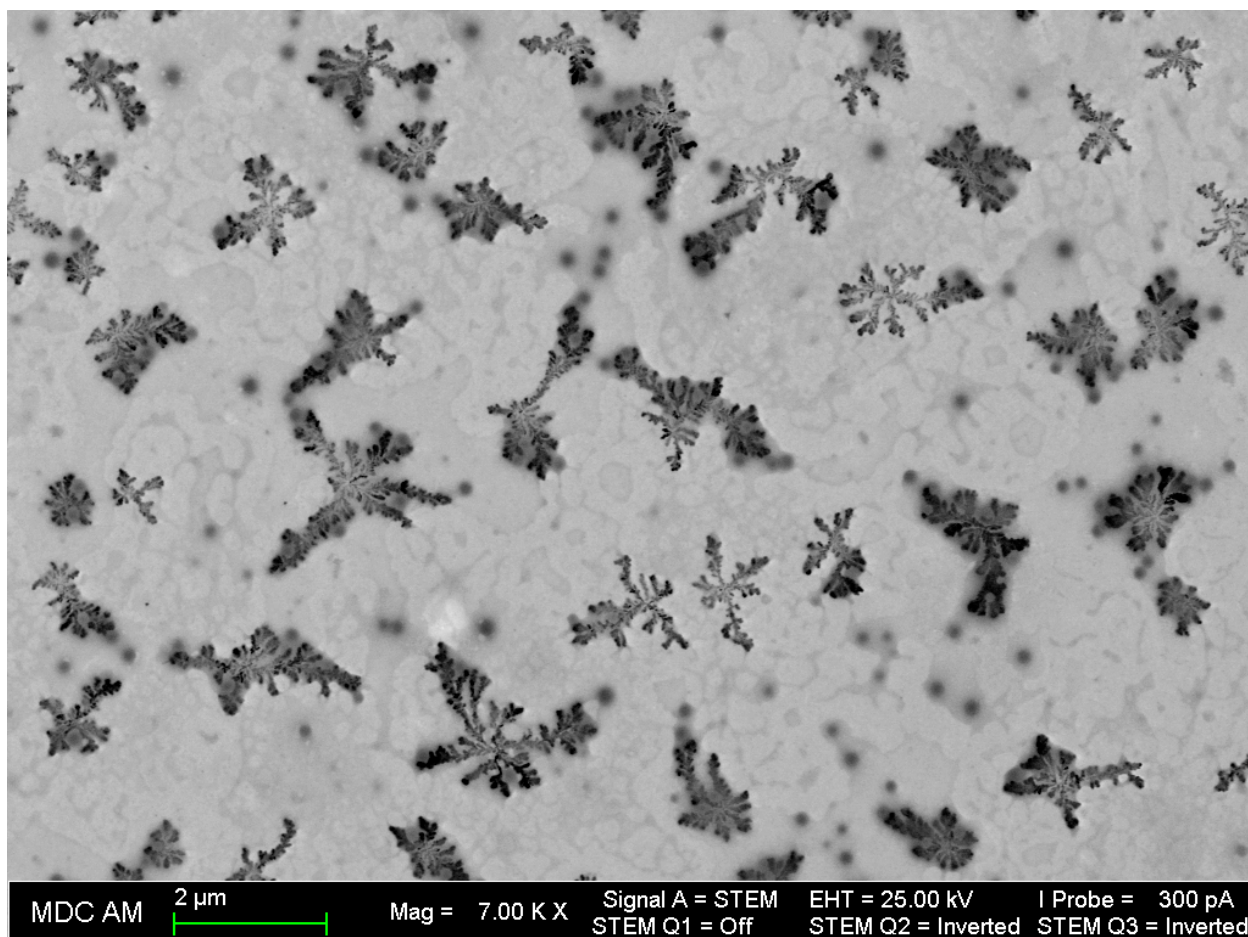

FigureS3. SEM image of US/TermRed-NP nanoparticles to confirm the statistics.

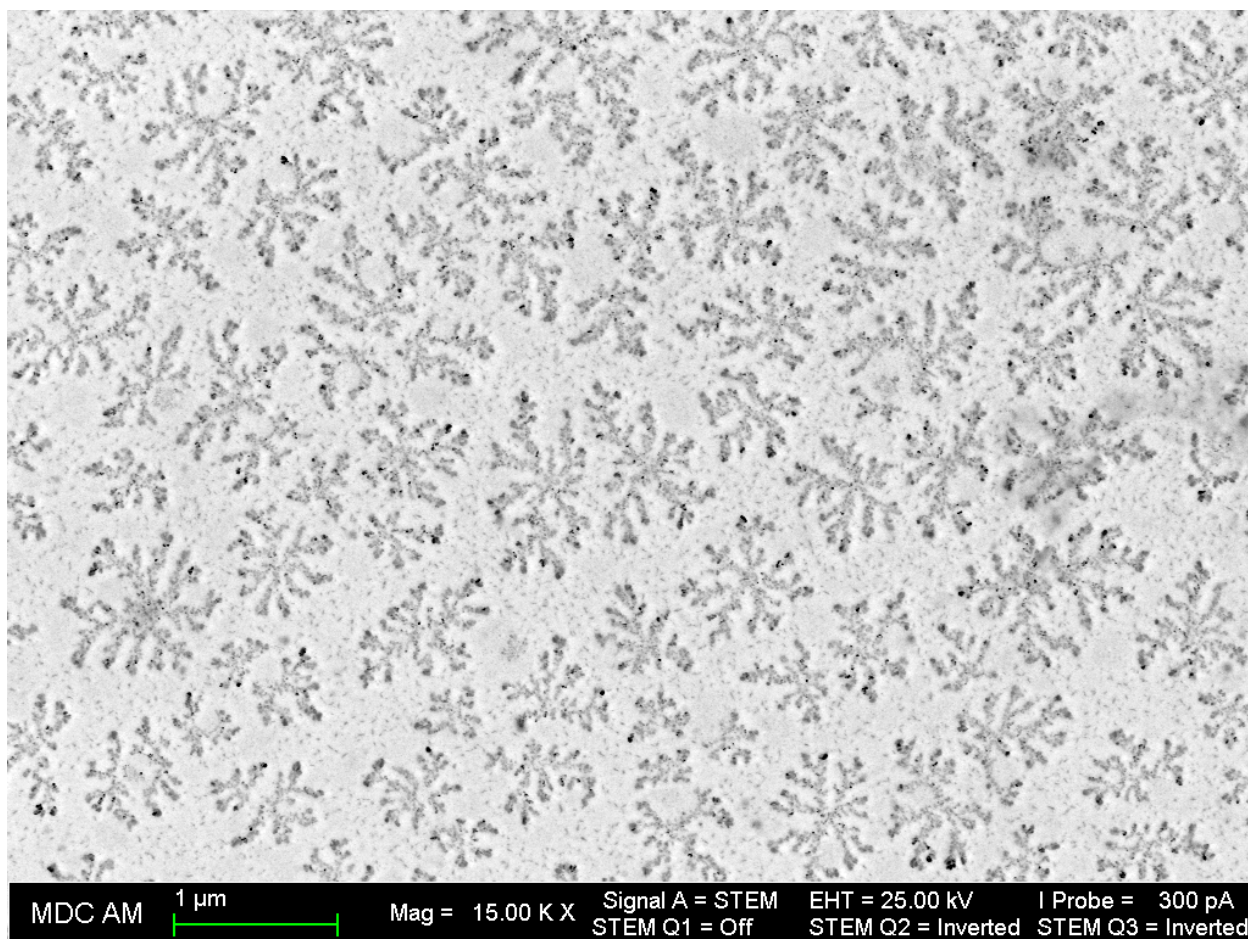

FigureS4. SEM image of US-NP nanoparticles to confirm the statistics.



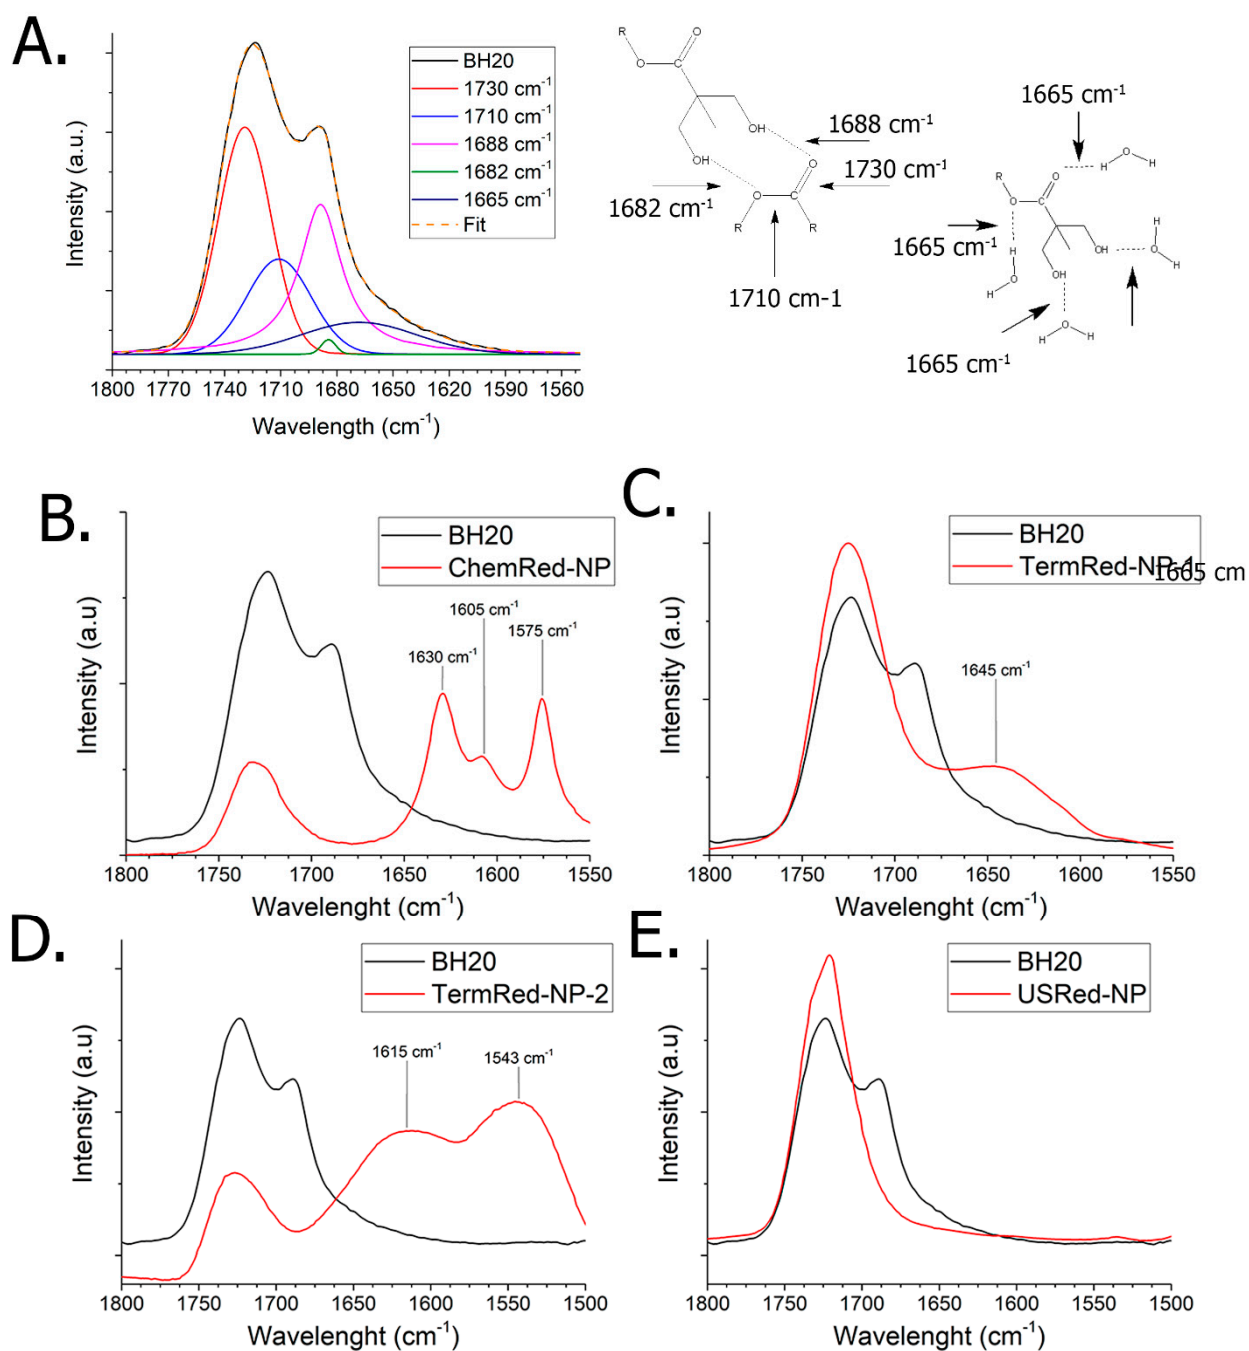

FigureS5. Ft-IR spectra: A) BH20; B) ChemRed-NP; C) TermRed-NP; D) US/TermRed-NP; E) US-NP.

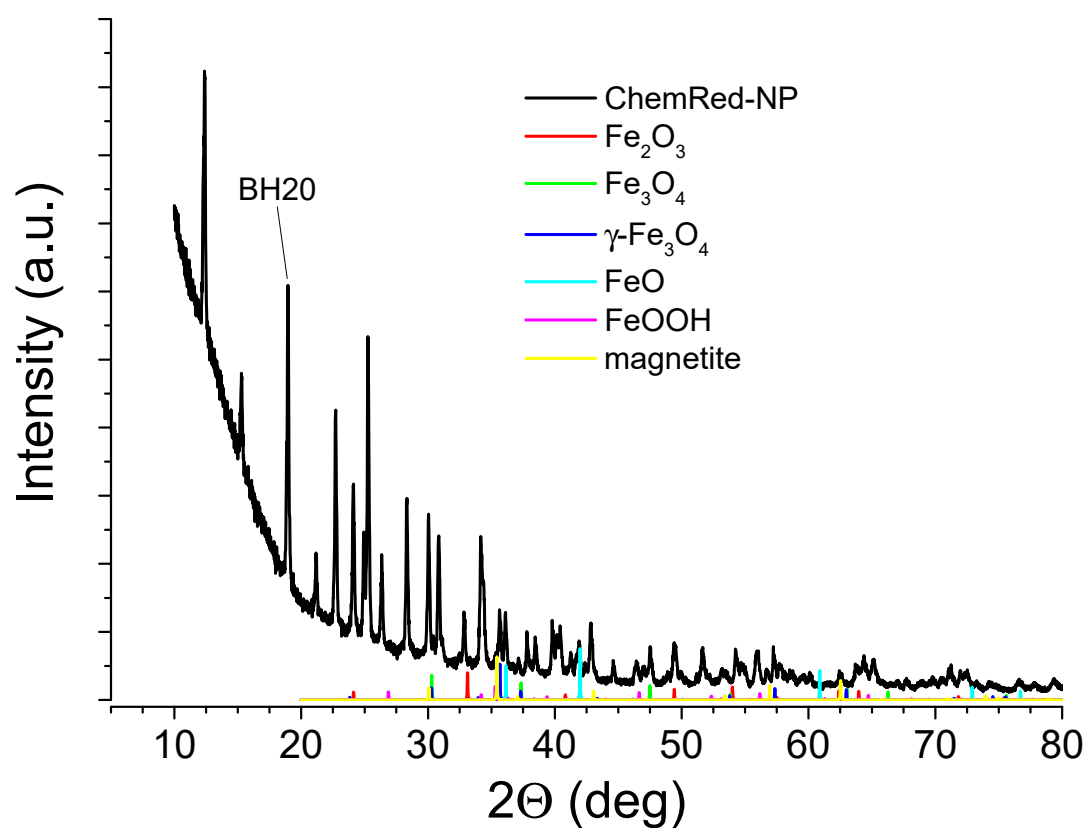

FigureS6 Full XRD spectra of **ChemRed-NP**.

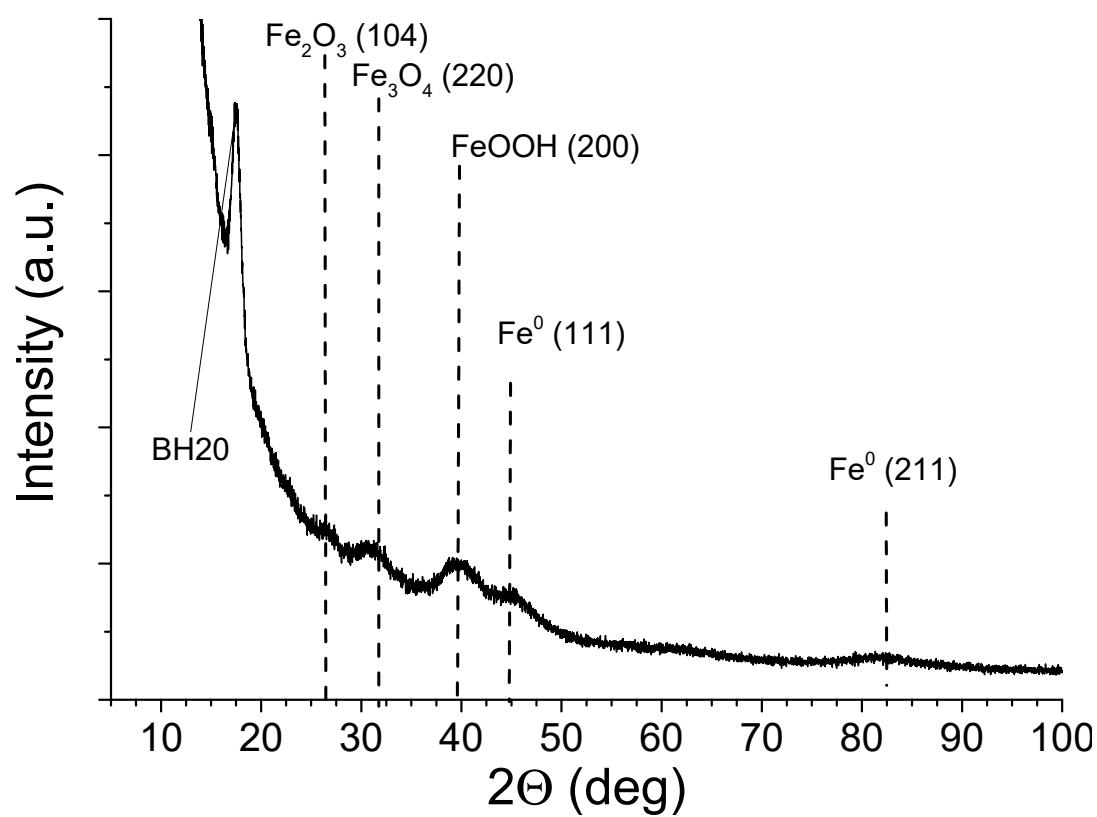

FigureS7 Full XRD spectra of **US-NP**.

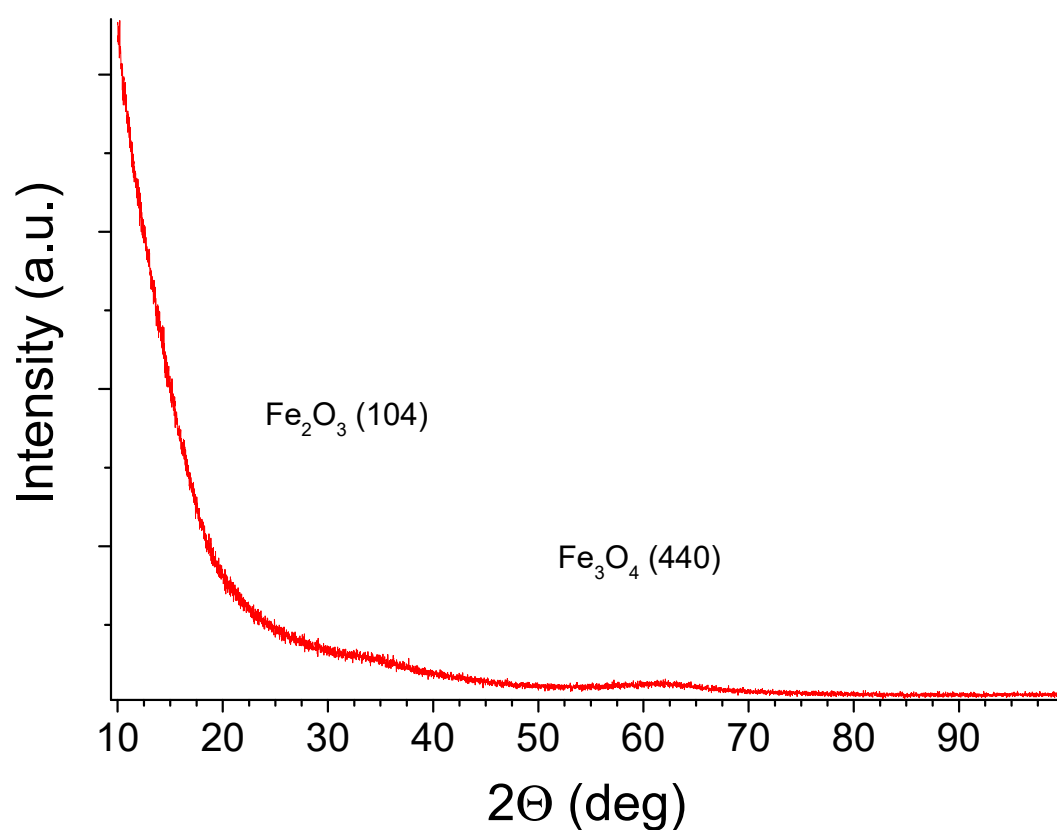

FigureS8. Full XRD spectra of US/TermRed.

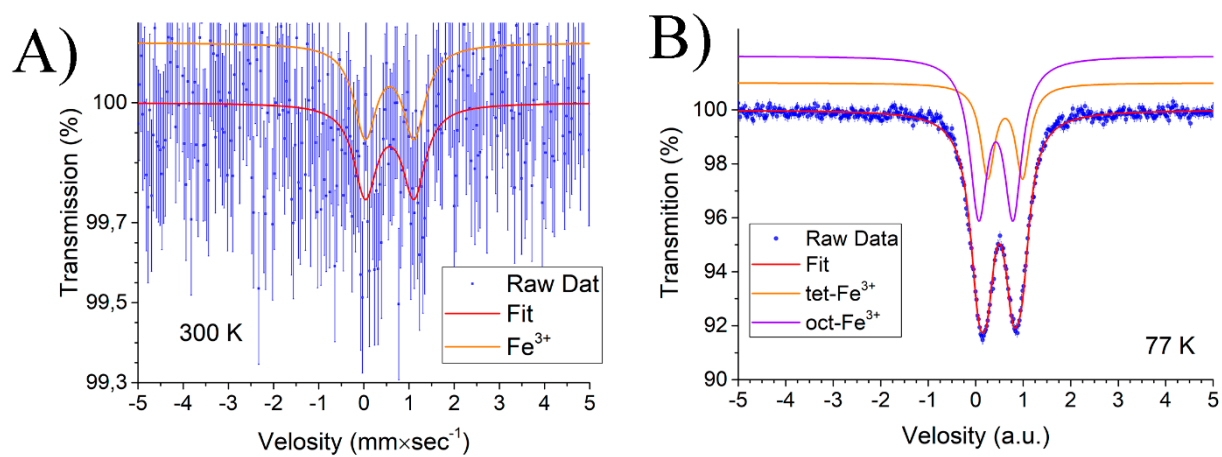

Figure S9 Mossbauer spectra of US/TermRed-NP with deconvolution: A) at 300 K; B) at 77 K.

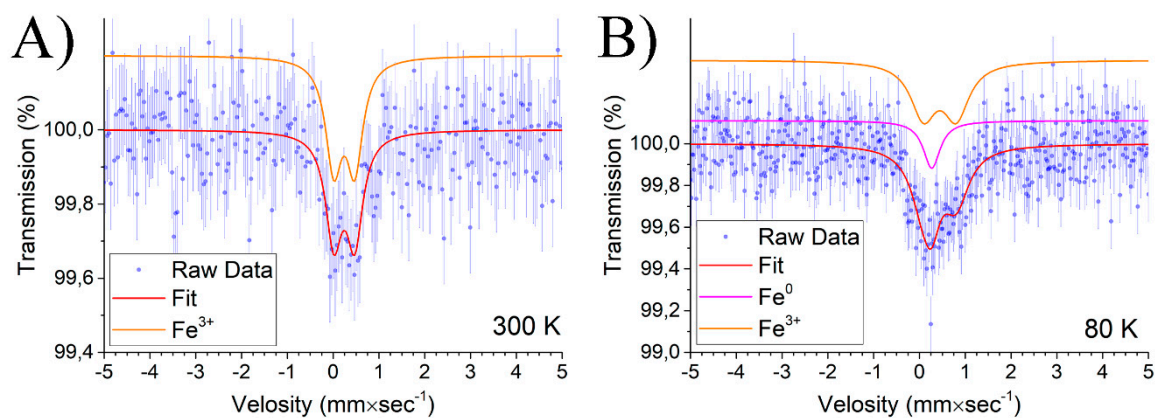

Figure S10 Mossbauer spectra of US-NP with deconvolution: A) at 300 K; B) at 80 K.

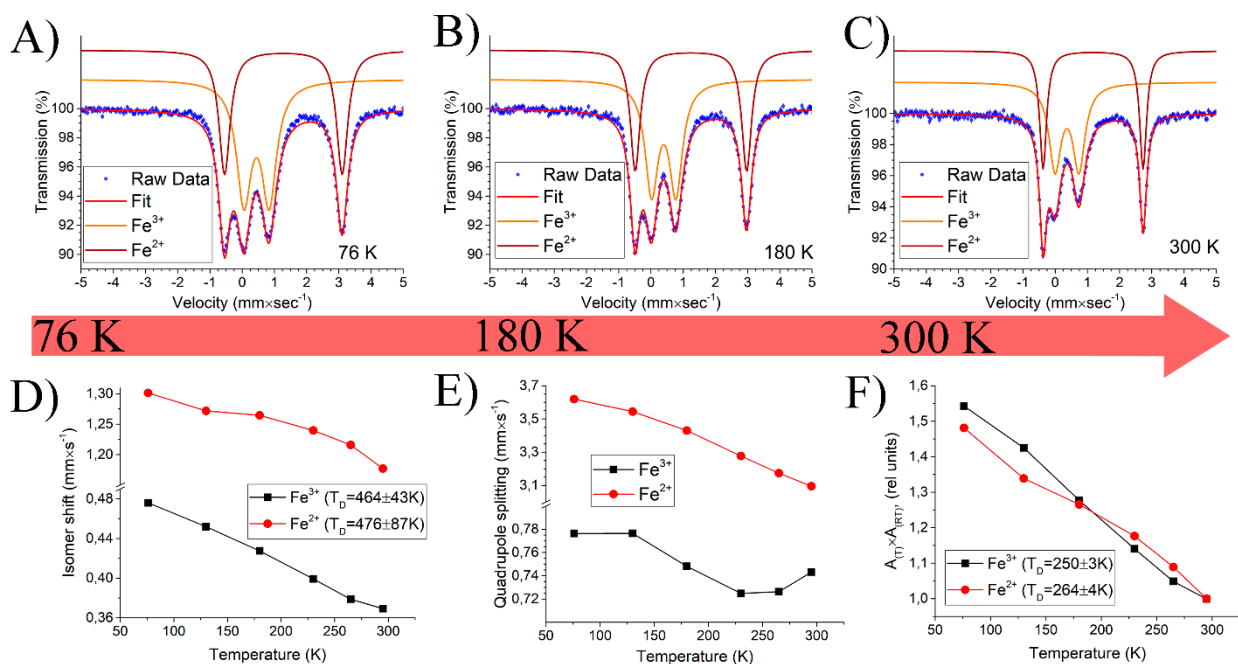

Figure S11 Mossbauer spectra of ChemRed-NP with deconvolution: A) at 76 K; B) at 180 K; C) at 300 K ; D) Isomer shifts at different temperatures; E) quadrupole splitting; F) Thermal deposition of ChemRed-NP



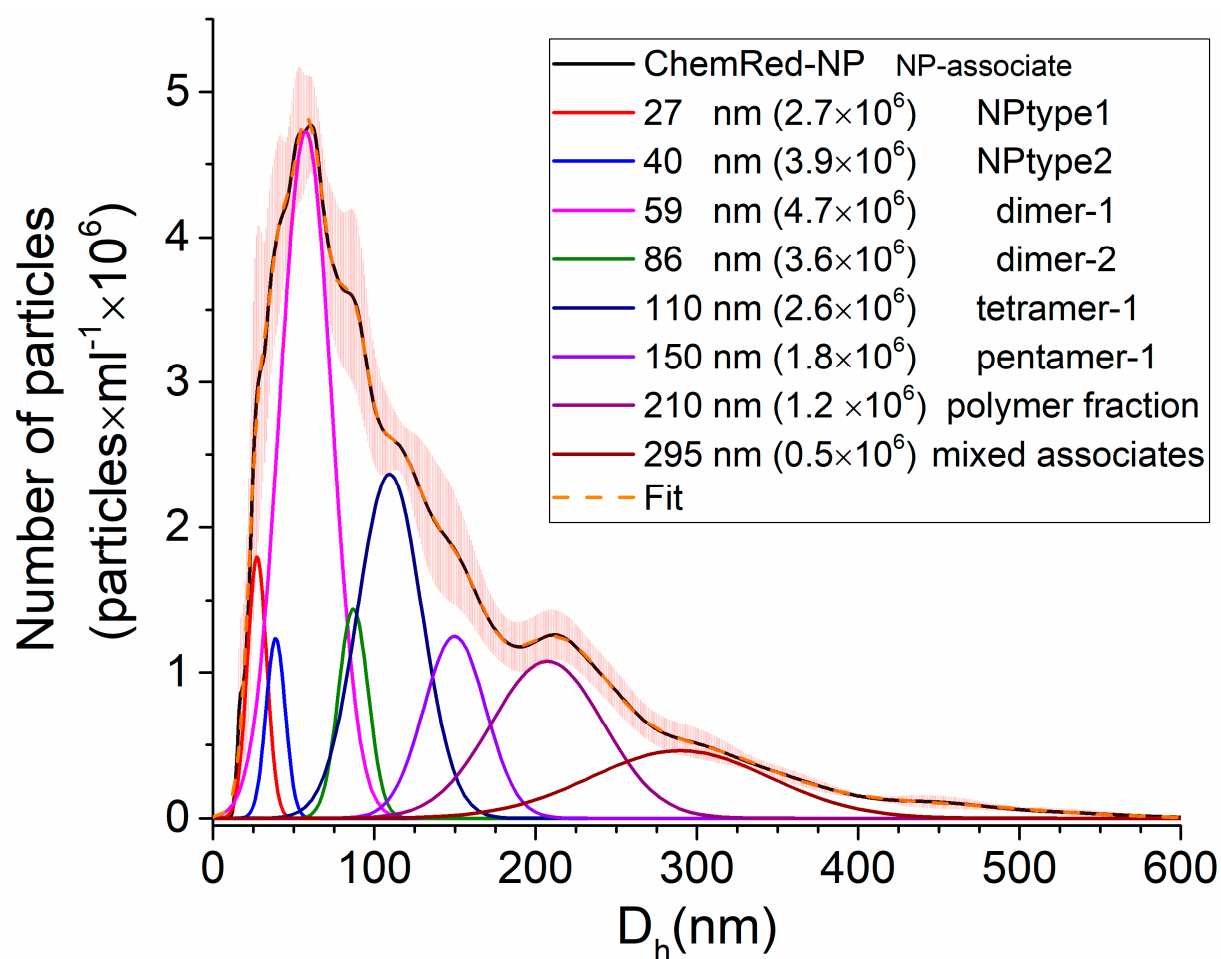

Figure S12. NTA analysis ChemRed-NP

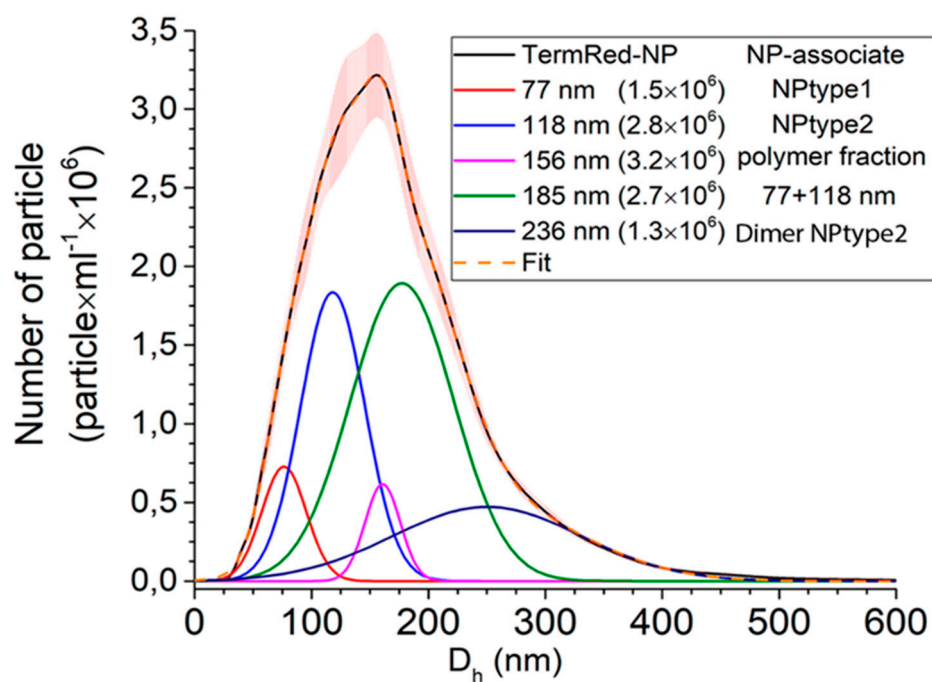

Figure S13. NTA analysis TermRed-NP

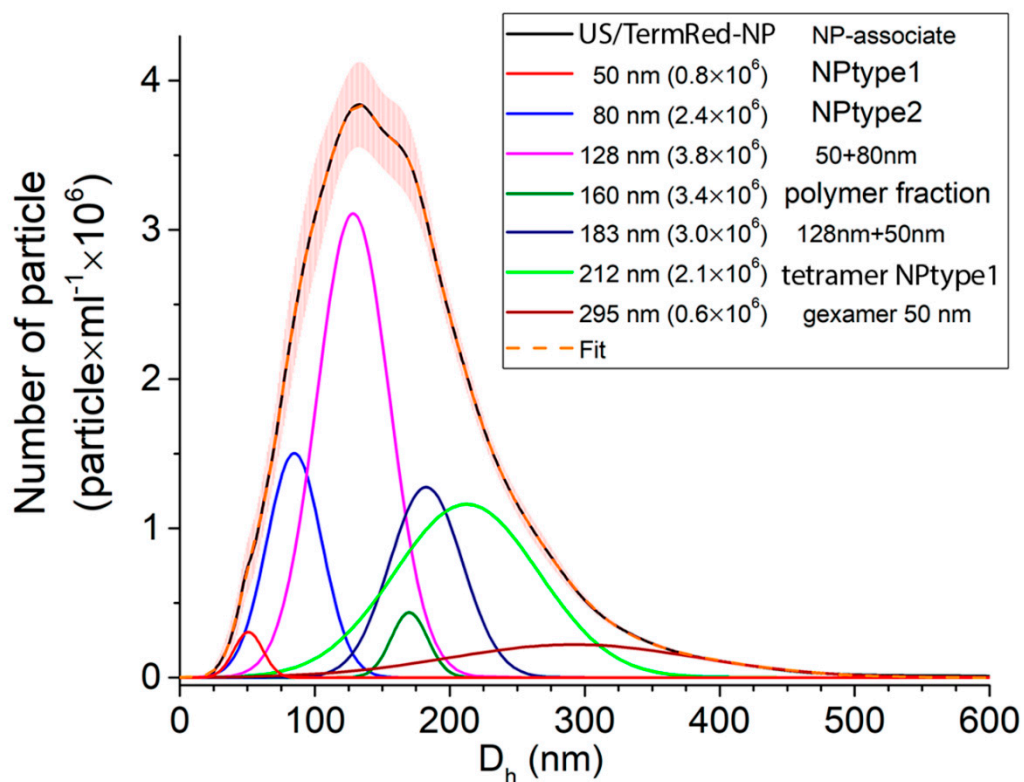

Figure S14. NTA analysis US/TermRed-NP

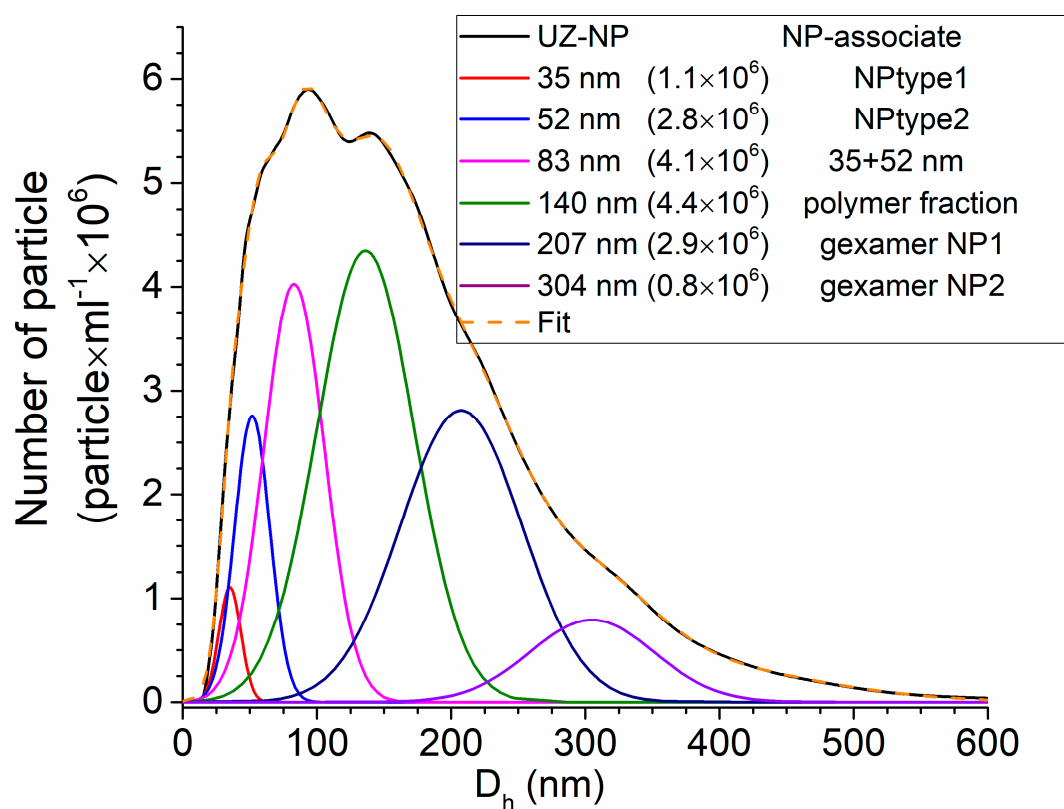

Figure S15. NTA analysis US-NP.
